# Supplementary material for: A rhodamine-6G-based “turn-on” fluorescent probe for selective detection of Fe3+ in living cells
Source: Royal Society of Chemistry journal article supplement (doi:10.1039/c8ay02659a), 2019-01-01
Supplement: c8ay02659a1.pdf [file c8ay02659a1.pdf]

## Supplementary data

### A Rhodamine-6G-based “turn-on” fluorescent probe for selective detection Fe<sup>3+</sup> in living cells

#### Figures

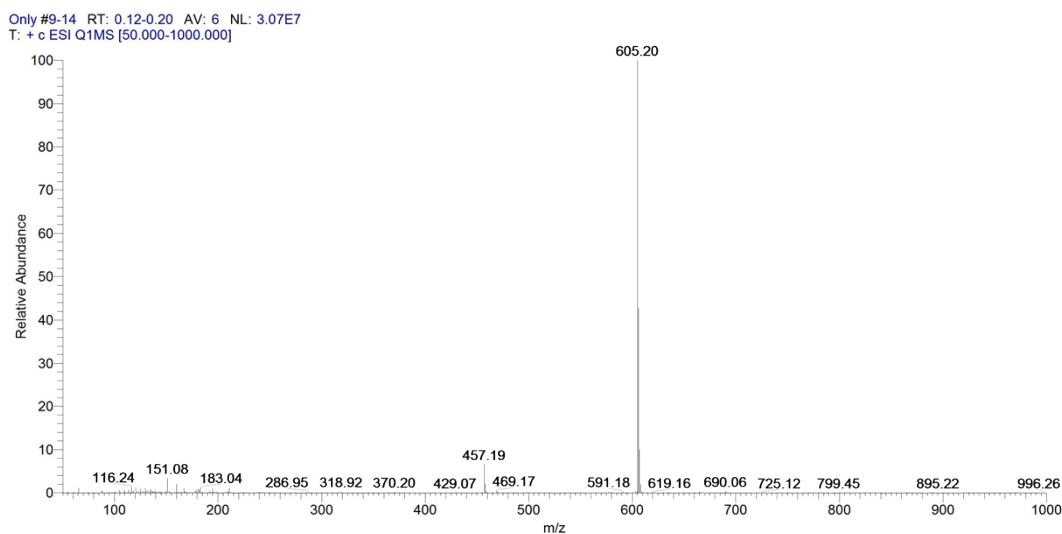

Fig. S1 MS spectrum of R6GES in MeOH.

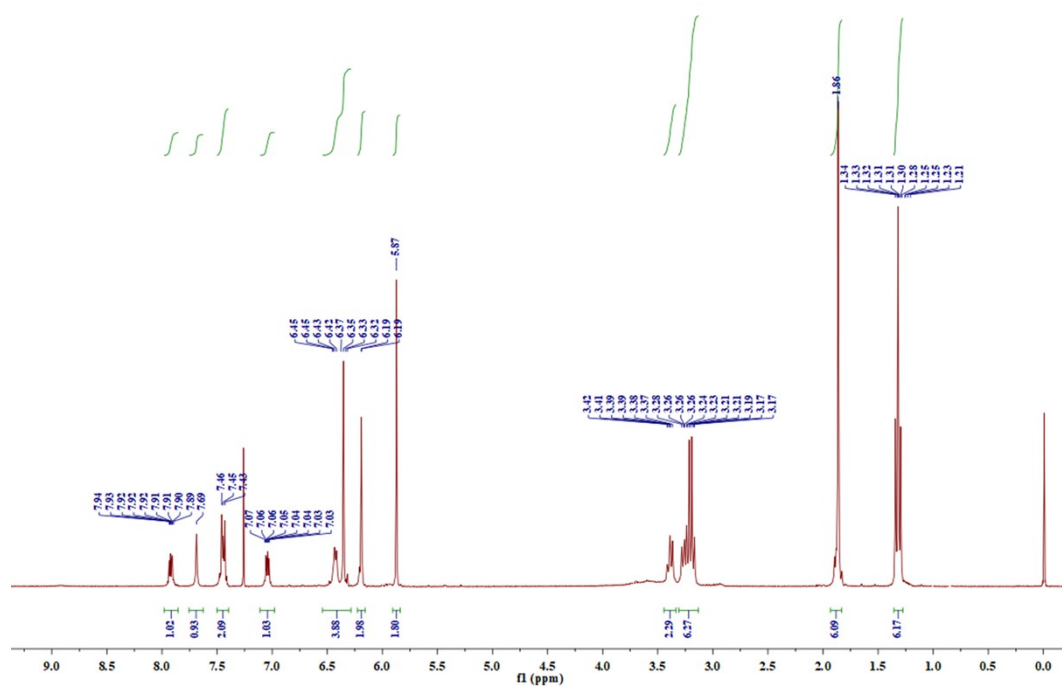

Fig. S2 <sup>1</sup>H-NMR spectrum of R6GES in CDCl<sub>3</sub>.

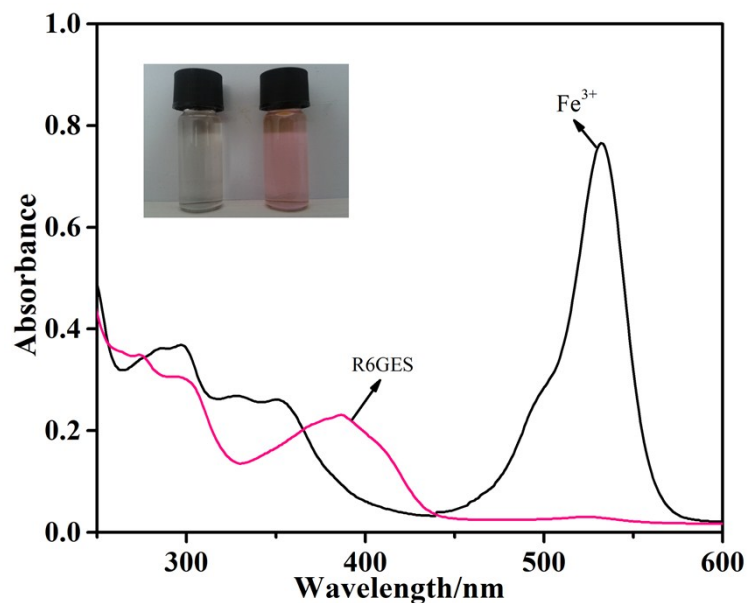

**Fig. S3** UV-Vis spectra of R6GES in the absence and presence of  $\text{Fe}^{3+}$ . Excitation wavelength was 525 nm. Inset is the color change.

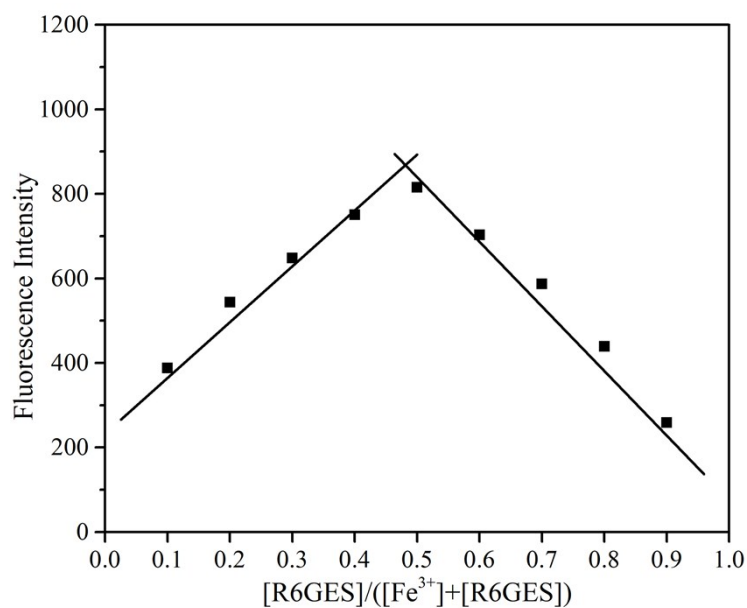

**Fig. S4** Job's plot for the stoichiometry determination of R6GES and  $\text{Fe}^{3+}$  in reaction. Excitation and emission wavelengths of fluorescence detection were set at 525 nm and 556 nm, respectively.  $[\text{Fe}^{3+}]$  and  $[\text{R6GES}]$  are the concentrations of  $\text{Fe}^{3+}$  and R6GES in the testing solutions.

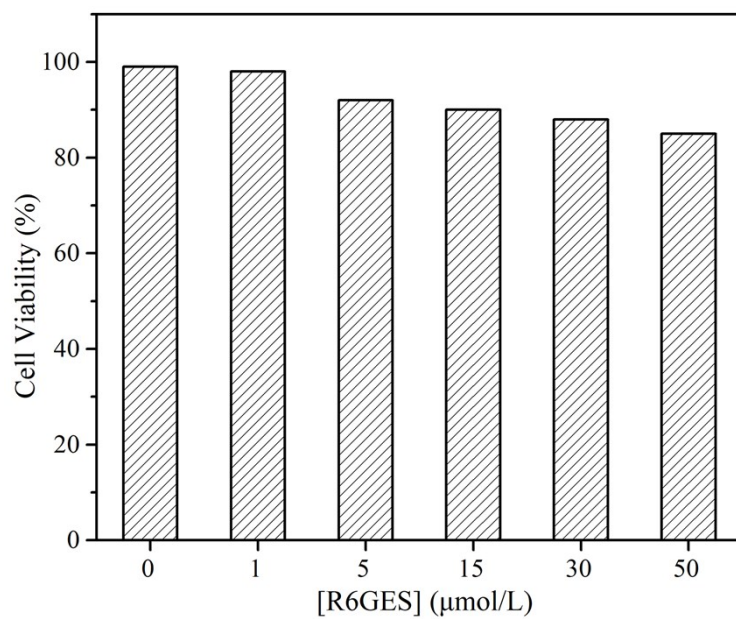

**Fig. S5** Cell viability values (%) estimated by MTT proliferation test versus incubation concentrations of R6GES. HeLa cells were cultured in the presence of 0-50 μmol/L R6GES.
